24 **ABSTRACT**

25 More than just a container for DNA, the nucleus carries out a wide variety of critical and  
26 highly regulated cellular functions. One of these functions is nuclear import, and in this  
27 study we investigate how altering nuclear import impacts developmental progression  
28 and organismal size. During early *Xenopus laevis* embryogenesis, the timing of a key  
29 developmental event, the midblastula transition (MBT), is sensitive to nuclear import  
30 factor levels. How might altering nuclear import and MBT timing in the early embryo  
31 affect downstream development of the organism? We microinjected *X. laevis* two-cell  
32 embryos to increase levels of importin  $\alpha$  or NTF2, resulting in differential amounts of  
33 nuclear import factors in the two halves of the embryo. Compared to controls, these  
34 embryos exhibited delayed gastrulation, curved neural plates, and bent tadpoles with  
35 different sized eyes. Furthermore, embryos microinjected with NTF2 developed into  
36 smaller froglets compared to control microinjected embryos. We propose that altering  
37 nuclear import and size affects MBT timing, cell size, and cell number, subsequently  
38 disrupting later development. Thus, altering nuclear import early in development can  
39 affect function and size at the organismal level.

## 40 INTRODUCTION

41 More than just a container for DNA, the nucleus carries out a wide variety of  
42 critical and highly regulated cellular functions. The nuclear envelope (NE) is composed  
43 of a double lipid bilayer. The outer nuclear membrane is continuous with the  
44 endoplasmic reticulum while the inner nuclear membrane is lined and supported by the  
45 nuclear lamina, composed of a meshwork of lamin intermediate filaments and lamin-  
46 associated proteins (1, 2). Nuclear pore complexes (NPC) that mediate  
47 nucleocytoplasmic transport are inserted into the NE at sites where the inner and outer  
48 nuclear membranes fuse (2-5). After mitosis and nuclear reassembly, lamins are  
49 imported into the nucleus along with other proteins containing nuclear localization  
50 signals (NLS). Classical nuclear import is mediated by importin  $\alpha/\beta$  karyopherins, which  
51 bind NLS-containing proteins and ferry them across the NPC and into the nucleus.  
52 Within the nucleus, Ran in its GTP-bound state binds to importin  $\beta$  thereby releasing  
53 NLS cargos. Another key player in this process is NTF2, a dedicated nuclear import  
54 factor for Ran (6-10). Associated with the NPC, NTF2 has been shown to reduce import  
55 of large cargos (11-13). While nuclear import is critical for a wide variety of cell functions  
56 (14, 15), in this study we investigate how altering nuclear import impacts developmental  
57 progression and organismal size.

58 In *Xenopus*, levels of two nuclear import factors were shown to tune rates of  
59 nuclear import, which coincidentally also impacted nuclear growth. Increased importin  $\alpha$   
60 levels generally positively scale with nuclear import and size while increased NTF2  
61 negatively regulates import of large cargos and nuclear size, although differential effects  
62 are observed when these factors are present at very high levels and depending on the

63 cellular context (12, 13). Nuclear lamins represent one imported cargo that contributes  
64 to nuclear growth (16). How might nuclear import impact development? During early *X.*  
65 *laevis* development, the first twelve cleavage cell divisions occur rapidly with little new  
66 transcription occurring (i.e. stages 1-8). Stage 8 coincides with the midblastula transition  
67 (MBT) when zygotic transcription is upregulated, cell cycles slow, and there is onset of  
68 cell division asynchrony and motility (17-20). While the DNA-to-cytoplasm ratio is one  
69 important factor that determines when the MBT initiates (17, 18, 21-23), we previously  
70 demonstrated that altering nuclear import and size in early *X. laevis* embryos also  
71 affects MBT timing (24, 25). An important question raised by these studies is how  
72 altering nuclear import and MBT timing in the early embryo affects downstream  
73 development of the organism.

74         Here we test how altering levels of nuclear import factors in the early embryo  
75 affects later development. Previous work has shown how levels of importin  $\alpha$  and NTF2  
76 impact nuclear import in *Xenopus* and cell culture, consistent with computer models (12,  
77 13, 26-29). It has also been shown that the levels of NTF2 inversely correlate with  
78 nuclear enlargement during melanoma progression and that NTF2 overexpression was  
79 sufficient to reduce nuclear size in primary melanoma (13). There is growing evidence  
80 that early embryogenesis and cancer progression share similar cellular features, such  
81 as rapid cell proliferation and increased cell motility, and that many embryo-specific  
82 genes and signaling pathways are reactivated in cancer (30, 31). For these reasons, we  
83 were particularly interested to test the developmental consequences of altering NTF2  
84 levels because of its potential involvement in carcinogenesis (13, 32). In this study, we  
85 investigate how altering nuclear import in *X. laevis* embryos impacts gastrulation,

86 neurulation, and development of tadpoles and froglets.

87

## 88 **RESULTS AND DISCUSSION**

89 We microinjected one blastomere of two-cell stage embryos with mRNA  
90 encoding nuclear import factors along with fluorescent dextran to trace cells that  
91 received the mRNA (Fig. 1A). One important advantage of this approach is that the  
92 uninjected half of the embryo serves as an internal control, thus facilitating the  
93 observation of any developmental differences between the two halves of the embryo. In  
94 some cases we differentially microinjected the two blastomeres to maximize potential  
95 nuclear import differences in the two halves (i.e. importin  $\alpha$ /lamin B3 in one half and  
96 NTF2 in the other half). For control experiments, embryos were microinjected with  
97 mRNA encoding either GFP or histone H2B-GFP. Embryos were microinjected with  
98 mRNA amounts previously shown to maximally alter nuclear size in vivo (Fig. S1) (12,  
99 13, 24).

100 To quantify the timing of gastrulation, we measured blastopore size in  
101 microinjected embryos 13 hours post fertilization (hpf). We previously showed that  
102 increasing importin  $\alpha$  and lamin B3 (LB3) expression levels led to premature onset of  
103 the MBT and accelerated blastopore closure during gastrulation (24). Conversely, NTF2  
104 microinjection delayed blastopore closure, and an even greater delay was observed  
105 when half the embryo was microinjected with NTF2 and the other half was microinjected  
106 with importin  $\alpha$ /LB3 (Fig. 1B). These data suggest that inducing differential nuclear  
107 import in the two halves of the embryo affects the timing of gastrulation.

108 We next examined how neurulation was affected when nuclear import was

109 manipulated early in development. Altering levels of nuclear import factors in half of the  
110 embryo frequently resulted in differential timing of neural plate closure in the two halves  
111 of the embryo (Fig. S2A, Videos 1-4). Consequently, these embryos exhibited a curved  
112 neural plate (Fig. 2A, S3A, Videos 5-6). This phenotype was observed in over 65% of  
113 NTF2-microinjected embryos, increasing to 85% for embryos microinjected to maximize  
114 the import differential in the two halves of the embryo (Fig. 2B). Similar phenotypes  
115 were observed when nuclear import factor mRNA was co-microinjected with H2B-GFP  
116 mRNA instead of dextran tracer and with frogs and embryos derived from two different  
117 frog colonies (Fig. S3). Furthermore, microinjection of importin  $\alpha$  alone induced a similar  
118 effect as importin  $\alpha$ /LB3 (Fig. 2 and S3), suggesting the curved neural plate phenotype  
119 resulted from altered nuclear import. The formation of curved neural plates was  
120 dependent on sufficiently altering nuclear import as microinjecting lower amounts of  
121 NTF2 mRNA (e.g. 50 pg) failed to induce neural plate bending (data not shown). When  
122 one-cell embryos were microinjected we observed no effect on the morphology of the  
123 neural plate compared to controls, demonstrating that the curved phenotype was  
124 dependent on there being differential amounts of nuclear import factors in the two  
125 halves of the embryo (Fig. S3B).

126         Interestingly, the neural plate generally curved toward the NTF2 injected side or  
127 away from the importin  $\alpha$ /LB3 injected side (Fig. 2A, S3). Altering MBT timing and the  
128 onset of longer cell cycles has been shown to indirectly impact cell size (24, 33-35). In  
129 particular, in the half of the embryo with increased importin  $\alpha$  levels and nuclear size,  
130 early onset of longer cell cycles results in larger cells, potentially explaining why the  
131 neural plate curved away from that side of the embryo. Indeed, consistent with these

132 previous reports, surface imaging showed smaller cells on the NTF2-injected side and  
133 larger cells on the importin  $\alpha$ -injected size (Fig. S2B-C).

134 We next asked if the bent neural plate phenotype was propagated later in  
135 development. More than 30% of NTF2-microinjected embryos exhibited a bent tadpole  
136 phenotype, again with the bend occurring toward the NTF2-microinjected side (Fig. 3,  
137 S4-S5). We also observed more than 30% of tadpoles with a smaller eye on the NTF2-  
138 microinjected side, with 16% of embryos showing both the small eye and bent body  
139 phenotype (Fig. 3, S4). The small eye phenotype was exacerbated in embryos  
140 microinjected to maximize nuclear import differences in the two halves of the embryo  
141 (Fig. 3B). Embryos microinjected at the one-cell stage did not develop into bent  
142 tadpoles (Fig. S5A), similar to what was observed for neurula. Similar bent tadpoles  
143 were observed with frogs and embryos derived from two different frog colonies as well  
144 as for embryos microinjected with importin  $\alpha$ /LB3 or importin  $\alpha$  alone (Fig. 3 and S5).

145 Lastly, we allowed microinjected embryos to develop into 4-month-old froglets.  
146 NTF2-microinjected embryos gave rise to significantly smaller froglets, with a small  
147 proportion exhibiting defective body morphologies (Fig. 4). Many of the NTF2-injected  
148 froglets did not survive to adulthood, however those that did were smaller than their  
149 control sexed counterparts (Fig. S6A). It is possible that the frogs generated from NTF2-  
150 injected embryos were smaller due to malnutrition associated with their morphological  
151 defects. Eggs produced by these smaller females were the same size as controls (Fig.  
152 S6B), although nuclei assembled de novo in extract isolated from their eggs were  
153 smaller (data not shown). Interestingly, erythrocyte nuclei were smaller in animals  
154 derived from NTF2-injected embryos compared to sexed controls (Fig. S6C). Consistent

155 with this coordination between body size and erythrocyte nuclear size, male erythrocyte  
156 nuclei were smaller than those in females, as has been observed in other amphibian  
157 species where males are smaller than females (36, 37). The erythrocyte nuclear-to-  
158 cytoplasmic volume ratio was the same for control females and males but reduced in  
159 the case of NTF2 microinjection (Table S1).

160 Taken together, we show that altering the levels of nuclear import factors in the  
161 early embryo leads to downstream effects on gastrulation, neurulation, and the  
162 development of tadpoles and froglets. Specifically, NTF2, importin  $\alpha$ , and lamin  
163 expression levels impact developmental outcomes. These results show how altering  
164 nuclear import can, perhaps indirectly, affect function and size at the organismal level.  
165 Furthermore, given the defects we observed in neural plate and body morphologies, our  
166 findings may be relevant to a wide range of diseases associated with neural tube  
167 defects (38). Because nuclear import impinges on a variety of different cellular functions  
168 (14, 15), we cannot at this time specify which altered function might be responsible for  
169 the observed effects on development. We will note that importin  $\alpha$ /LB3 microinjection  
170 increases nuclear size while NTF2 microinjection decreases nuclear size (Fig. S1) (12,  
171 13, 24). One possibility is that altering nuclear import and size in the early embryo leads  
172 to changes in MBT timing that in turn impact cell size and number, subsequently  
173 disrupting later stages of development.

174

## 175 **MATERIALS AND METHODS**

### 176 **Plasmids**

177 Plasmids consisting of pCS2+ containing the coding sequences for human



178 importin  $\alpha$ 2-E (pDL17), *X. tropicalis* GFP-LB3 (pDL19), and NTF2 (pDL18) were  
179 described previously (12, 13). For control injections, we used GFP mRNA expressed  
180 from pCS107-GFP3STOP or H2B-GFP mRNA expressed from CS2-H2BeGFP (gifts  
181 from John Wallingford, University of Texas at Austin).

182

### 183 ***Xenopus laevis* embryos and microinjections**

184 *X. laevis* embryos were obtained by in vitro fertilization of freshly laid *X. laevis*  
185 eggs with crushed *X. laevis* testes (39). Only batches with greater than 90% fertilization  
186 efficiency were used. Twenty minutes after fertilization, embryos were de-jellied in 2.5%  
187 cysteine pH 7.8 dissolved in 1/3x MMR (20x MMR = 2 mM EDTA, 2 M NaCl, 40 mM  
188 KCl, 20 mM MgCl<sub>2</sub>, 40 mM CaCl<sub>2</sub>, 100 mM HEPES pH 7.8). Embryos were staged  
189 according to (40). All *Xenopus* procedures and studies were conducted in compliance  
190 with the US Department of Health and Human Services Guide for the Care and Use of  
191 Laboratory Animals. Protocols were approved by the University of Wyoming Institutional  
192 Animal Care and Use Committee (Assurance # A-3216-01).

193 Following linearization of pCS107-GFP3STOP, CS2-H2BeGFP, pDL17, pDL18,  
194 and pDL19, mRNA was expressed from the SP6 promoter using the mMessage  
195 mMachin kit (Ambion). Embryos at the one-cell or two-cell stage were transferred to  
196 1/3 MMR plus 2.5% Ficoll and microinjected with 10 nL volumes using a PicoSpritzer III  
197 (Parker). Different amounts of mRNA were injected by varying the concentration of the  
198 mRNA stock solution. Unless otherwise indicated, the following mRNA amounts were  
199 used for each microinjection: 250 pg GFP, 100 pg H2B-GFP, 175 pg NTF2, 250 pg  
200 importin  $\alpha$ , 250 pg GFP-LB3. This amount of NTF2 mRNA maximally decreases nuclear

201 size (13), while these amounts of importin  $\alpha$  and GFP-LB3 mRNA maximally increase  
202 nuclear size (24). After 45 minutes, the buffer was changed to 1/3x MMR and embryos  
203 were allowed to develop to desired stages. Tadpoles were grown in 1/3x MMR in small  
204 tanks with water filtration at room temperature. During metamorphosis, froglets were  
205 grown in the same water as adults at room temperature. Tadpoles and froglets were fed  
206 tadpole frog brittle (Nasco SA05964) and post-metamorphic frog brittle (Nasco  
207 SB29027), respectively.

208 In most experiments, one blastomere of a two-cell embryo was co-microinjected  
209 with mRNA and 50 ng of a fluorescently labeled dextran that served as a marker for the  
210 injected half. Dextrans used were lysine-fixable tetramethylrhodamine-labeled dextran,  
211 70,000 MW (ThermoFisher, D1818) or lysine-fixable fluorescein-labeled dextran, 70,000  
212 MW (ThermoFisher, D1822). For control experiments, mRNA expressing GFP or H2B-  
213 GFP was used.

214

## 215 **Microscopy and image quantification**

216 For Figure S1, microinjected embryos at stage 11 were transferred to 1/3x MMR  
217 containing 10  $\mu$ g/ml Hoechst. Subsequently, embryos were squashed between a glass  
218 coverslip and slide for imaging. For erythrocyte measurements, adult frogs were  
219 anesthetized in 0.05% benzocaine prior to blood draw. Abdominal skin was dried and  
220 punctured with a sterile 30G $\frac{1}{2}$  needle. Blood was immediately smeared on the surface  
221 of a glass slide and fixed in methanol for 3 minutes at room temperature. Blood smears  
222 were stained in 1x Giemsa stain (Sigma G5637) for 45 minutes at room temperature.  
223 Nuclei and erythrocytes were visualized with an Olympus BX51 fluorescence

224 microscope using an Olympus UPLFLN 20x (N.A. 0.50, air) objective. Images were  
225 acquired with a QIClick Digital CCD Camera, Mono, 12-bit (model QIClick-F-M-12) at  
226 room temperature using Olympus cellSens software. Nuclear and erythrocyte cross-  
227 sectional areas were quantified from original thresholded images using cellSens  
228 Dimension imaging software (Olympus).

229         Brightfield and fluorescence imaging of eggs, embryos, and tadpoles was  
230 performed with an Olympus SZX16 research fluorescence stereomicroscope, equipped  
231 with Olympus DP72 camera, 11.5x zoom microscope body, and SDFPLAPO1XPF  
232 objective. Brightfield time-lapse imaging of embryos was performed at room  
233 temperature, and images were acquired every 5 minutes. Discontinuous light was used  
234 to illuminate embryos, controlled with a digital adjustable cycle timer (CT-1 Short Cycle  
235 Timer, Innovative Grower Corp). Swimming tadpoles were anesthetized in 1/3x MMR  
236 containing 0.05% benzocaine prior to imaging. Blastopore area and egg size were  
237 quantified from original thresholded images using cellSens Dimension imaging software  
238 (Olympus). Eye areas and body angles in swimming tadpoles were measured from  
239 original images using cellSens Dimension imaging software measurement tools  
240 (Olympus). Froglets were anesthetized in 0.05% benzocaine to measure body mass  
241 and length. Froglets and frogs were imaged in plastic containers using a cell phone  
242 camera.

243         Where indicated, confocal imaging was performed on a spinning-disk confocal  
244 microscope based on an Olympus IX71 microscope stand equipped with a five line  
245 LMM5 laser launch (Spectral Applied Research) and Yokogawa CSU-X1 spinning-disk  
246 head. Confocal images were acquired with an EM-CCD camera (ImagEM,

247 Hamamatsu). Z-axis focus was controlled using a piezo Pi-Foc (Physik Instrumentes),  
248 and multiposition imaging was achieved using a motorized Ludl stage. An Olympus  
249 UPLSAPO 20xO/0.85na objective was used. Image acquisition and all system  
250 components were controlled using Metamorph software.

251

## 252 **Statistics**

253 Averaging and statistical analysis were performed for independently repeated  
254 experiments. Two-tailed Student's t tests assuming equal variances were performed in  
255 Excel (Microsoft) to evaluate statistical significance. The p values, sample sizes, and  
256 error bars are given in the figure legends.

257

## 258 **ACKNOWLEDGMENTS**

259 We thank John Wallingford (University of Texas, Austin) for plasmids, Rebecca Heald  
260 (University of California, Berkeley) for support in the early stages of this research, and  
261 Karen White (University of Wyoming) for critical reading of the manuscript.

262

## 263 **COMPETING INTERESTS**

264 No competing interests declared.

265

## 266 **FUNDING**

267 This work was supported by the National Institutes of Health/National Institute of  
268 General Medical Sciences (R01GM113028) and the American Cancer Society (RSG-  
269 15-035-01-DDC).

270

271 **REFERENCES**

- 272 1. Dittmer TA, Misteli T. The lamin protein family. *Genome Biol.* 2011;12(5):222.
- 273 2. Wilson KL, Berk JM. The nuclear envelope at a glance. *J Cell Sci.* 2010;123(Pt  
274 12):1973-8.
- 275 3. Rothballer A, Kutay U. SnapShot: the nuclear envelope II. *Cell.* 2012;150(5):1084-  
276 e1.
- 277 4. Rothballer A, Kutay U. SnapShot: The nuclear envelope I. *Cell.* 2012;150(4):868- e1.
- 278 5. Misteli T, Spector DL. *The Nucleus.* Cold Spring Harbor, New York: Cold Spring  
279 Harbor Laboratory Press; 2011. 517 p.
- 280 6. Madrid AS, Weis K. Nuclear transport is becoming crystal clear. *Chromosoma.*  
281 2006;115(2):98-109.
- 282 7. Stewart M. Molecular mechanism of the nuclear protein import cycle. *Nat Rev Mol*  
283 *Cell Biol.* 2007;8(3):195-208.
- 284 8. Fried H, Kutay U. Nucleocytoplasmic transport: taking an inventory. *Cell Mol Life Sci.*  
285 2003;60(8):1659-88.
- 286 9. Dickmanns A, Kehlenbach RH, Fahrenkrog B. Nuclear Pore Complexes and  
287 Nucleocytoplasmic Transport: From Structure to Function to Disease. *Int Rev Cell*  
288 *Mol Biol.* 2015;320:171-233.
- 289 10. Hutten S, Kehlenbach RH. CRM1-mediated nuclear export: to the pore and beyond.  
290 *Trends Cell Biol.* 2007;17(4):193-201.
- 291 11. Feldherr C, Akin D, Moore MS. The nuclear import factor p10 regulates the  
292 functional size of the nuclear pore complex during oogenesis. *J Cell Sci.* 1998;111 (

- 293 Pt 13):1889-96.
- 294 12. Levy DL, Heald R. Nuclear size is regulated by importin alpha and Ntf2 in *Xenopus*.  
295 Cell. 2010;143(2):288-98.
- 296 13. Vukovic LD, Jevtic P, Zhang Z, Stohr BA, Levy DL. Nuclear size is sensitive to NTF2  
297 protein levels in a manner dependent on Ran binding. J Cell Sci. 2016;129(6):1115-  
298 27.
- 299 14. Macara IG. Transport into and out of the nucleus. Microbiol Mol Biol Rev.  
300 2001;65(4):570-94, table of contents.
- 301 15. Mackmull MT, Klaus B, Heinze I, Chokkalingam M, Beyer A, Russell RB, et al.  
302 Landscape of nuclear transport receptor cargo specificity. Mol Syst Biol.  
303 2017;13(12):962.
- 304 16. Jevtic P, Edens LJ, Li X, Nguyen T, Chen P, Levy DL. Concentration-dependent  
305 Effects of Nuclear Lamins on Nuclear Size in *Xenopus* and Mammalian Cells. J Biol  
306 Chem. 2015;290(46):27557-71.
- 307 17. Newport J, Kirschner M. A major developmental transition in early *Xenopus*  
308 embryos: I. characterization and timing of cellular changes at the midblastula stage.  
309 Cell. 1982;30(3):675-86.
- 310 18. Newport J, Kirschner M. A major developmental transition in early *Xenopus*  
311 embryos: II. Control of the onset of transcription. Cell. 1982;30(3):687-96.
- 312 19. Newport JW, Kirschner MW. Regulation of the cell cycle during early *Xenopus*  
313 development. Cell. 1984;37(3):731-42.
- 314 20. Collart C, Owens ND, Bhaw-Rosun L, Cooper B, De Domenico E, Patrushev I, et al.  
315 High-resolution analysis of gene activity during the *Xenopus* mid-blastula transition.

- 316 Development. 2014;141(9):1927-39.
- 317 21. Clute P, Masui Y. Regulation of the appearance of division asynchrony and  
318 microtubule-dependent chromosome cycles in *Xenopus laevis* embryos. *Dev Biol.*  
319 1995;171(2):273-85.
- 320 22. Kobayakawa Y, Kubota HY. Temporal pattern of cleavage and the onset of  
321 gastrulation in amphibian embryos developed from eggs with the reduced  
322 cytoplasm. *J Embryol Exp Morphol.* 1981;62:83-94.
- 323 23. Clute P, Masui Y. Microtubule dependence of chromosome cycles in *Xenopus laevis*  
324 blastomeres under the influence of a DNA synthesis inhibitor, aphidicolin. *Dev Biol.*  
325 1997;185(1):1-13.
- 326 24. Jevtic P, Levy DL. Nuclear size scaling during *Xenopus* early development  
327 contributes to midblastula transition timing. *Curr Biol.* 2015;25(1):45-52.
- 328 25. Jevtic P, Levy DL. Both Nuclear Size and DNA Amount Contribute to Midblastula  
329 Transition Timing in *Xenopus laevis*. *Sci Rep.* 2017;7(1):7908.
- 330 26. Gorlich D, Seewald MJ, Ribbeck K. Characterization of Ran-driven cargo transport  
331 and the RanGTPase system by kinetic measurements and computer simulation.  
332 *Embo J.* 2003;22(5):1088-100.
- 333 27. Riddick G, Macara IG. A systems analysis of importin- $\alpha$ - $\beta$  mediated  
334 nuclear protein import. *J Cell Biol.* 2005;168(7):1027-38.
- 335 28. Riddick G, Macara IG. The adapter importin- $\alpha$  provides flexible control of  
336 nuclear import at the expense of efficiency. *Mol Syst Biol.* 2007;3:118.
- 337 29. Smith AE, Slepchenko BM, Schaff JC, Loew LM, Macara IG. Systems analysis of  
338 Ran transport. *Science.* 2002;295(5554):488-91.

- 339 30. Ma Y, Zhang P, Wang F, Yang J, Yang Z, Qin H. The relationship between early  
340 embryo development and tumorigenesis. *J Cell Mol Med.* 2010;14(12):2697-701.
- 341 31. Aiello NM, Stanger BZ. Echoes of the embryo: using the developmental biology  
342 toolkit to study cancer. *Dis Model Mech.* 2016;9(2):105-14.
- 343 32. Jevtic P, Levy DL. Mechanisms of nuclear size regulation in model systems and  
344 cancer. *Adv Exp Med Biol.* 2014;773:537-69.
- 345 33. Amodeo AA, Jukam D, Straight AF, Skotheim JM. Histone titration against the  
346 genome sets the DNA-to-cytoplasm threshold for the *Xenopus* midblastula transition.  
347 *Proc Natl Acad Sci U S A.* 2015;112(10):E1086-95.
- 348 34. Collart C, Allen GE, Bradshaw CR, Smith JC, Zegerman P. Titration of four  
349 replication factors is essential for the *Xenopus laevis* midblastula transition. *Science.*  
350 2013;341(6148):893-6.
- 351 35. Wang P, Hayden S, Masui Y. Transition of the blastomere cell cycle from cell size-  
352 independent to size-dependent control at the midblastula stage in *Xenopus laevis*. *J*  
353 *Exp Zool.* 2000;287(2):128-44.
- 354 36. Hota J, Das M, Mahapatra PK. Blood Cell Profile of the Developing Tadpoles and  
355 Adults of the Ornate Frog, *Microhyla ornata* (Anura: Microhylidae). *International*  
356 *Journal of Zoology.* 2013;2013:716183.
- 357 37. Das M, Mahapatra PK. Hematology of Wild Caught Dubois's Tree Frog *Polypedates*  
358 *teraiensis*, Dubois, 1986 (Anura: Rhacophoridae). *The Scientific World Journal.*  
359 2014;2014:491415.
- 360 38. Copp AJ, Greene ND. Neural tube defects--disorders of neurulation and related  
361 embryonic processes. *Wiley Interdiscip Rev Dev Biol.* 2013;2(2):213-27.



362 39. Sive HL, Grainger RM, Harland RM. Early development of *Xenopus laevis* : a  
363 laboratory manual. Cold Spring Harbor, N.Y.: Cold Spring Harbor Laboratory Press;  
364 2000. ix, 338 p. p.

365 40. Nieuwkoop PD, Faber J. Normal Table of *Xenopus laevis* (Daudin). 2nd ed.  
366 Amsterdam: North-Holland Publishing Company; 1967.

367

## 368 **FIGURE LEGENDS**

369 **Figure 1: Differential nuclear import in the two halves of an early embryo delays**

370 **gastrulation. (A)** Experimental approach. One blastomere of a two-cell stage *X. laevis*

371 embryo was co-microinjected with mRNA to alter nuclear import factor levels and

372 fluorescently labeled dextran as a cell tracer. Embryos were allowed to develop to

373 different stages to assess effects on developmental progression. **(B)** Microinjections

374 were performed as shown in (A) with 250 pg GFP mRNA, 175 pg NTF mRNA, or 250 pg

375 importin  $\alpha$  mRNA + 250 pg GFP-LB3 mRNA. These amounts, that maximally affect

376 nuclear size (13, 24), were used in all experiments. Microinjected two-cell embryos were

377 allowed to develop to 13 hpf gastrula. Representative vegetal pole images are shown.

378 Blastopore area was measured and averaged for 10-13 embryos per condition. Error

379 bars represent SD. \*\*\*  $p < 0.005$ , \*  $p < 0.05$ .

380

381 **Figure 2: Differential nuclear import in the two halves of an early embryo leads to**

382 **neural plate curvature. (A)** Two-cell embryos were microinjected as indicated and

383 allowed to develop to 22 hpf neurula. Representative images are shown. **(B)** Neurula

384 were scored as having normal or curved neural plates by drawing a line through the

385 middle of the embryo. Embryo numbers: n=19 for GFP, n=21 for NTF2, n=7 for imp  $\alpha$  +  
386 GFP-LB3/NTF2.

387

388 **Figure 3: Differential nuclear import in the two halves of an early embryo leads to**

389 **bent tadpoles. (A)** Two-cell embryos were microinjected as indicated and allowed to

390 develop into 9 dpf swimming tadpoles. Representative images are shown. Single-

391 headed arrows indicate small eyes. Double-headed arrows indicate bent bodies. **(B)**

392 Tadpoles were scored as indicated by measuring eye areas and body axis angles.

393 Embryo numbers: n=10 for GFP, n=25 for NTF2, n=18 for imp  $\alpha$  + GFP-LB3/NTF2.

394

395 **Figure 4: Differential nuclear import in the two halves of an early embryo leads to**

396 **smaller froglets.** Two-cell embryos were microinjected as indicated and allowed to

397 develop into 4-month-old froglets. Froglet numbers: n=33 for GFP and n=50 for NTF2.

398 **(A)** Representative froglets. **(B)** Quantification of froglet body mass and length. **(C)**

399 Scoring of froglets with altered body morphology as indicated. Error bars represent SD.

400 \*\*\* p<0.005.

**Figure 1**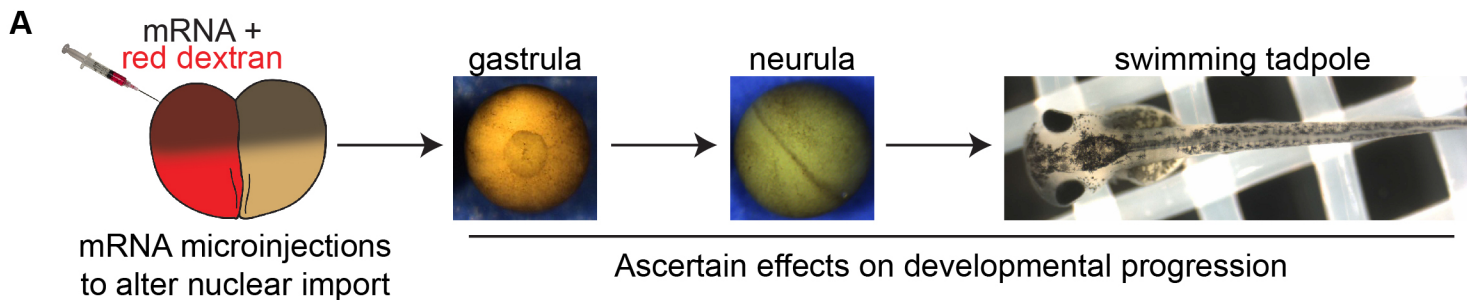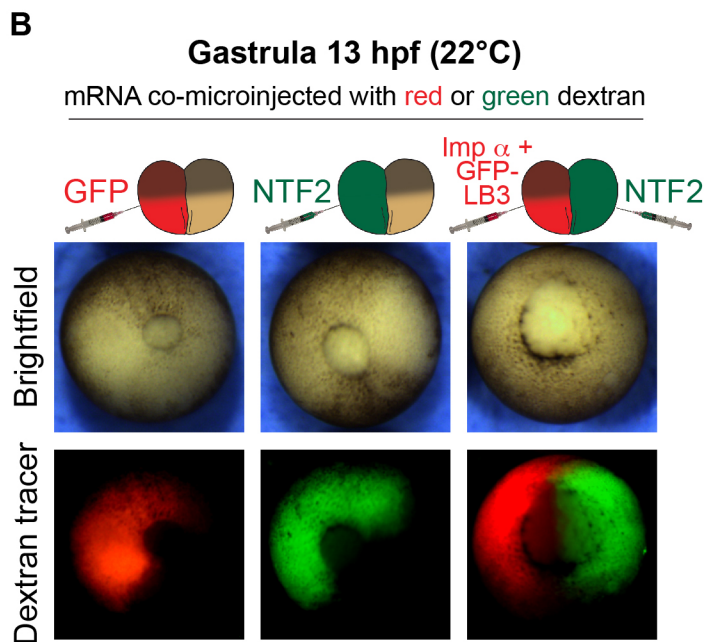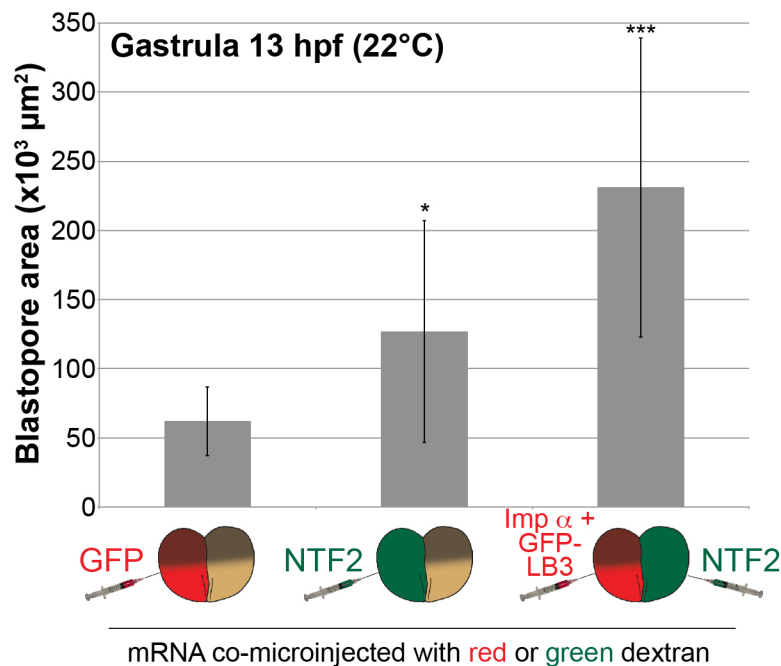

Figure 2

A

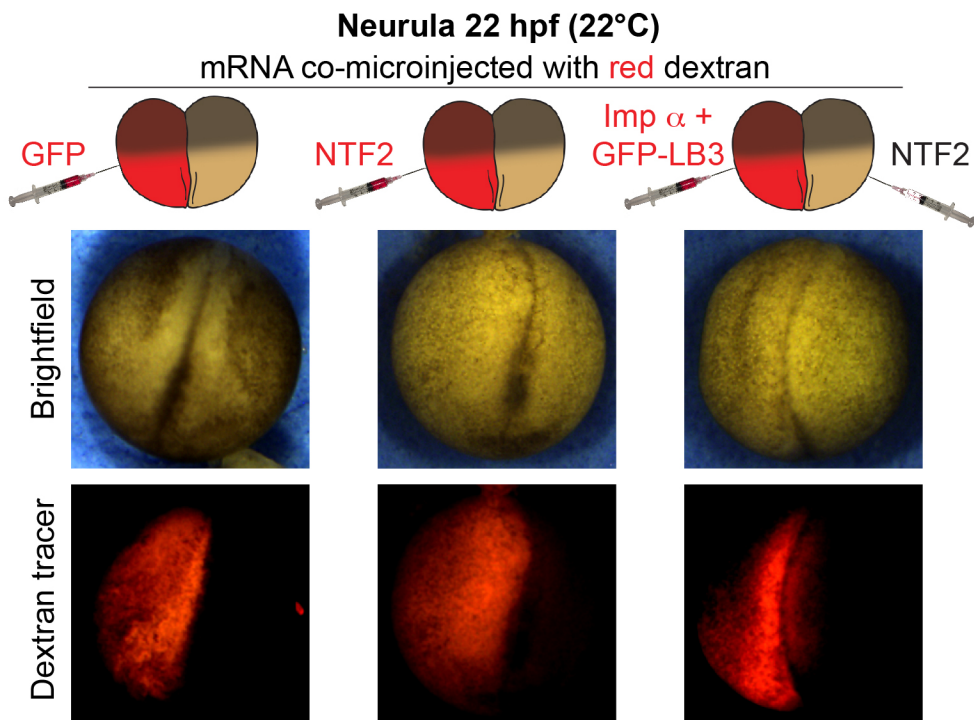

B

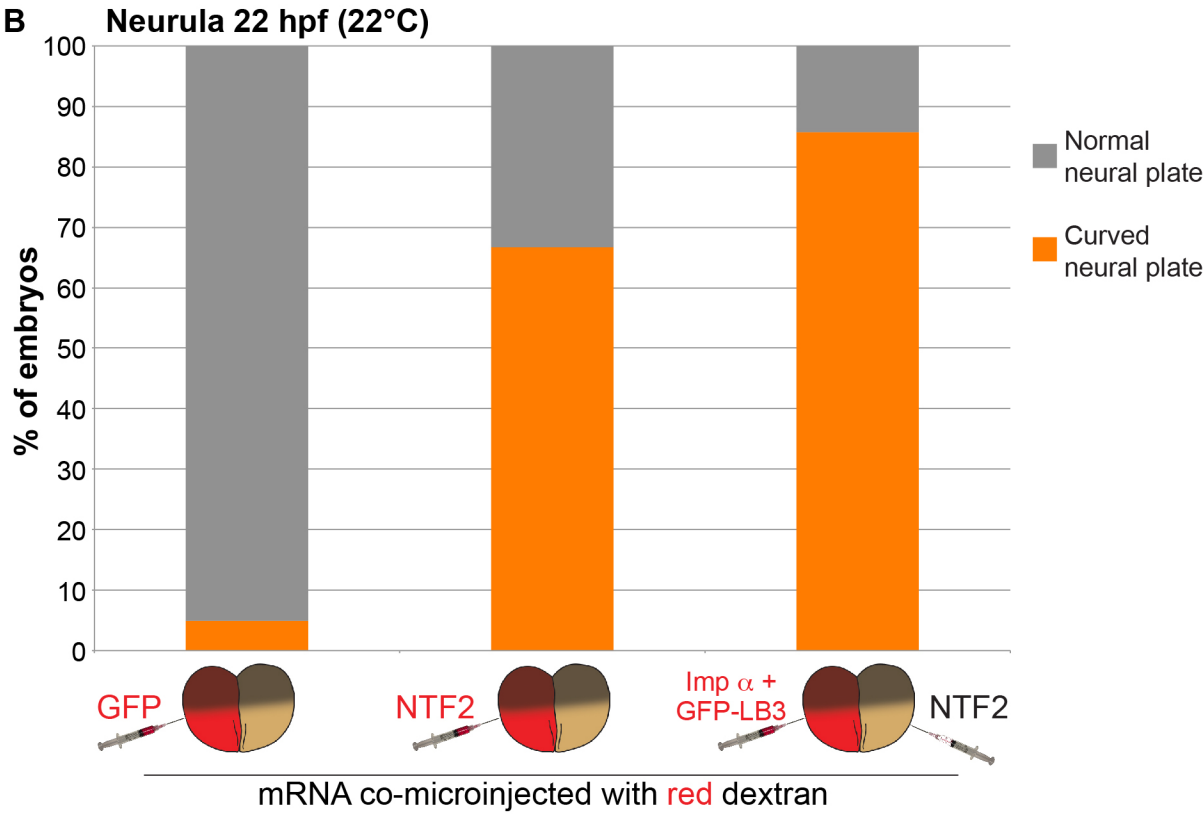

**Figure 3****A****Swimming tadpoles 9 dpf (22°C)**

mRNA co-microinjected with red dextran

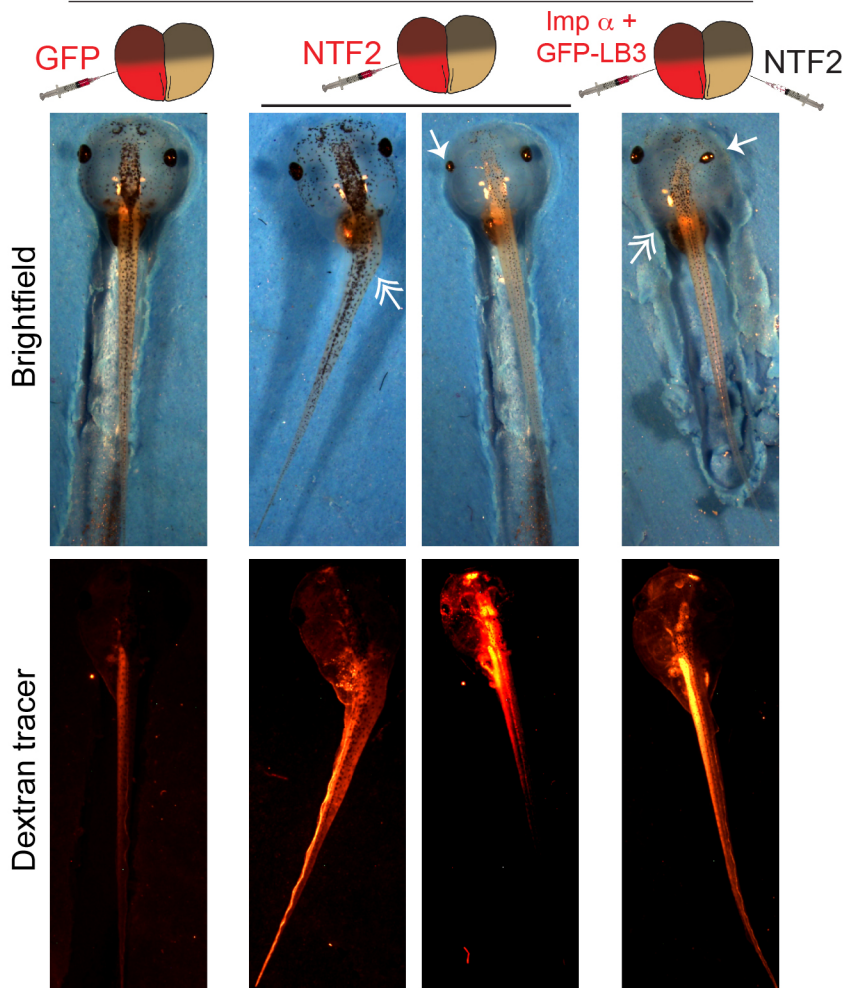**B****Swimming tadpoles 9 dpf (22°C)**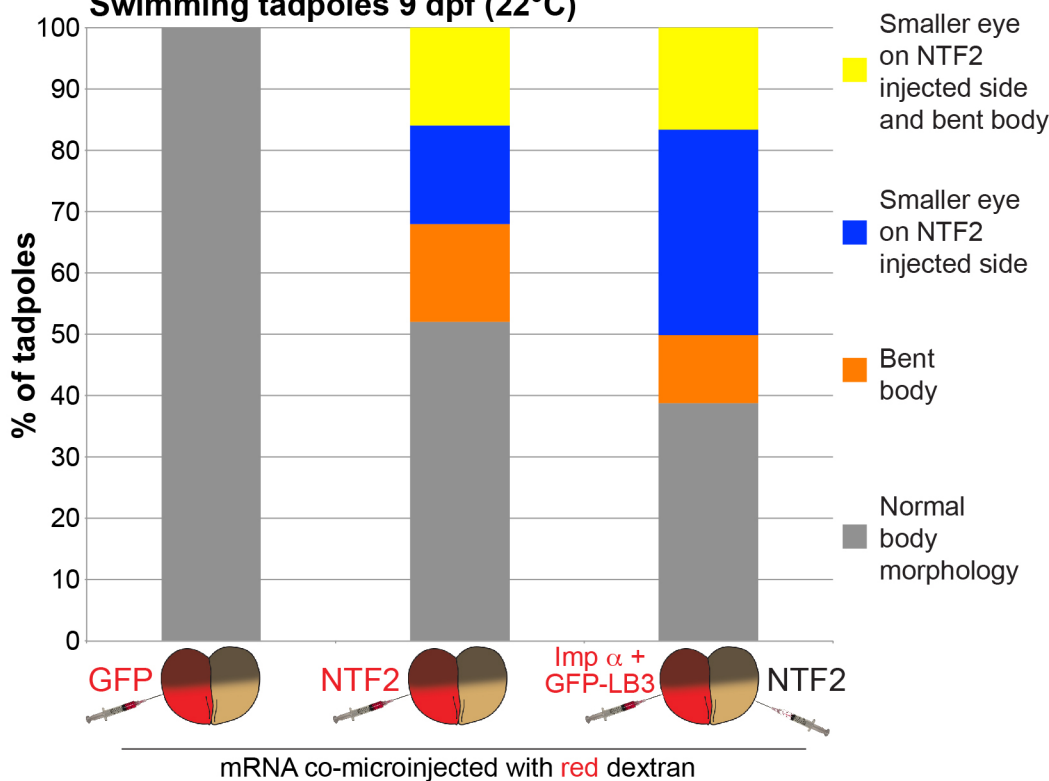

**Figure 4****A**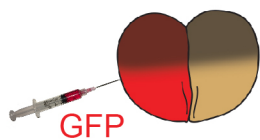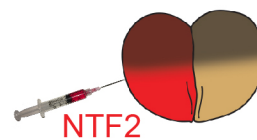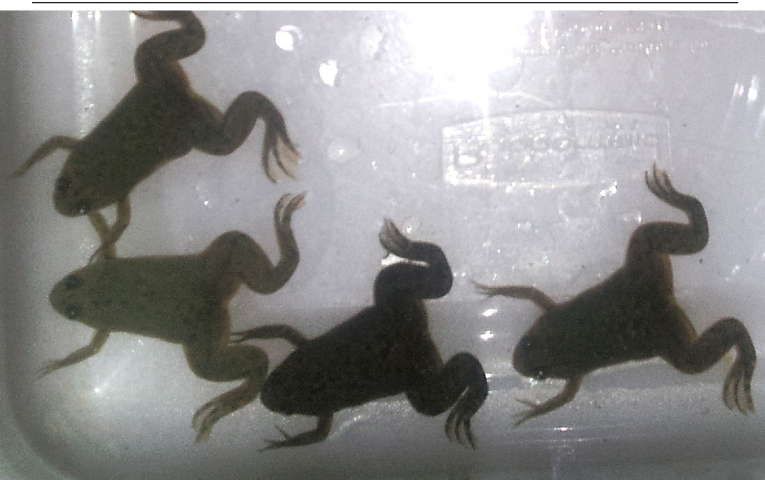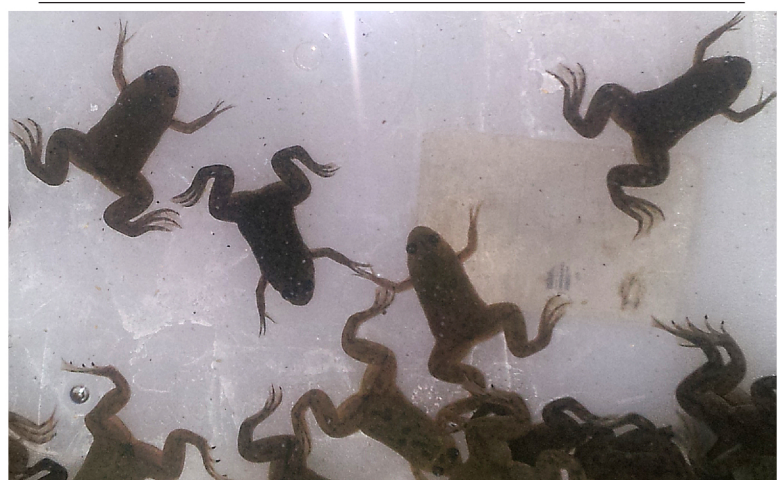**4 month old froglets****B**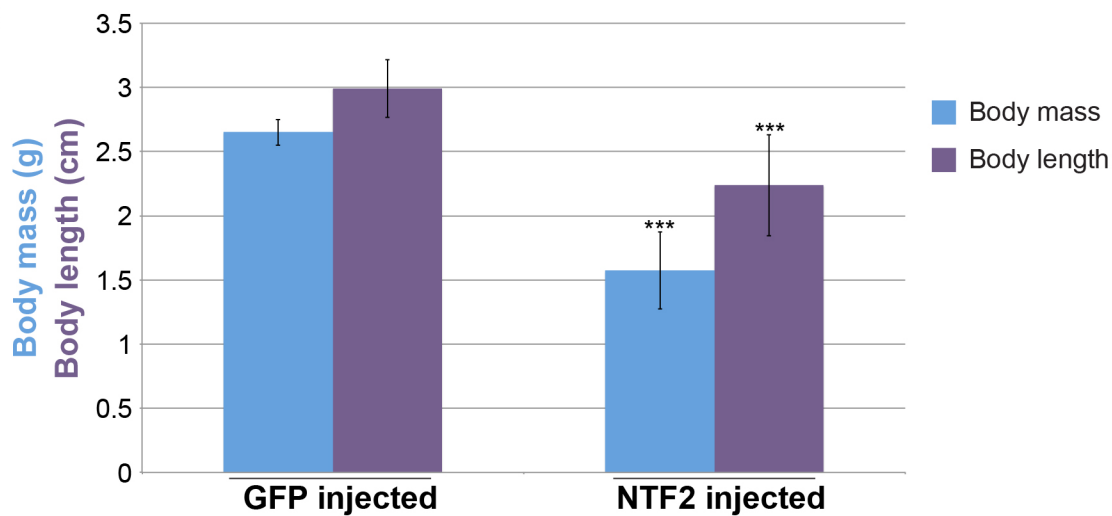**C**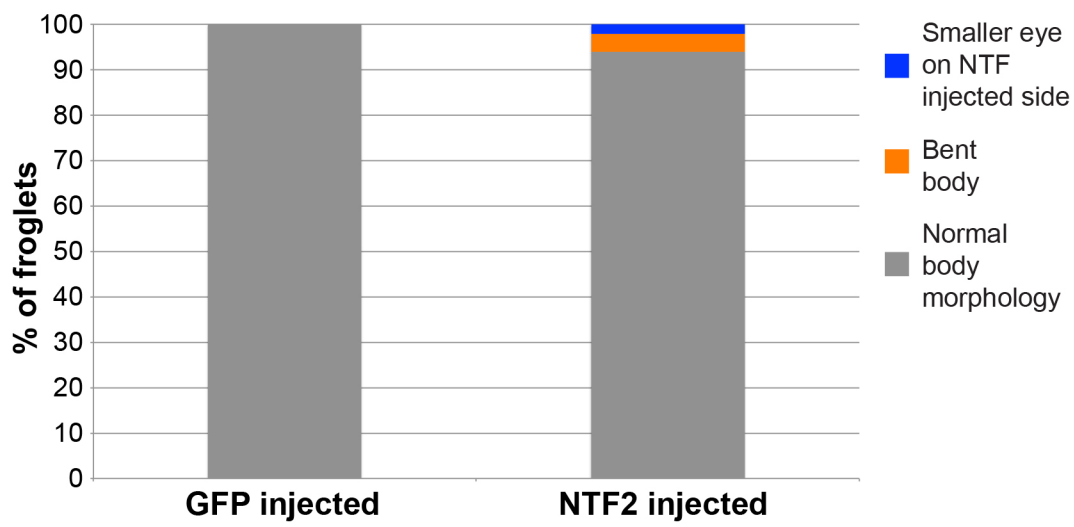

Source: https://www.biorxiv.org/content/10.1101/510313v1.full.pdf
